# Supplementary material for: Enrichment of high-grade tumors in breast cancer gene expression studies
Source: Springer Nature journal article supplement (doi:10.1007/s10549-017-4622-9), 2017-12-18

## Supplementary Tables and Figures

### Enrichment of high grade tumors in breast cancer gene expression studies

*Breast Cancer Research and Treatment*

van Seijen M<sup>a,b,1</sup>, Mooyaart AL<sup>a,c,1</sup>, Mulder L<sup>a</sup>, Hoogstraat ML<sup>a,e</sup>, Drukker CA<sup>f</sup>, Loo CE<sup>g</sup>, Pouw B<sup>f</sup>, Sonke GS<sup>h</sup>, Wesseling J<sup>a,d,2</sup>, Lips EH<sup>a,d,2\*</sup>

\*Corresponding author: E.H.Lips, The Netherlands Cancer Institute, Plesmanlaan 121, 1066 CX Amsterdam, The Netherlands, [e.lips@nki.nl](mailto:e.lips@nki.nl), Tel: +31 (0)20 5122045, Fax: +31 (0)20 5122050.

- a) Department of Molecular Pathology, the Netherlands Cancer Institute, Plesmanlaan 121, 1066 CX Amsterdam, the Netherlands,
- b) Department of Pathology, VU University Medical Centre, De Boelelaan 1117, 1081 HV Amsterdam, the Netherlands
- c) Department of Pathology, Erasmus University Medical Center, Wytemaweg 80 3015 CN Rotterdam, the Netherlands,
- d) Department of Pathology, the Netherlands Cancer Institute, Plesmanlaan 121, 1066 CX Amsterdam, the Netherlands
- e) Department of Molecular Carcinogenesis, the Netherlands Cancer Institute, Plesmanlaan 121, 1066 CX Amsterdam, the Netherlands
- f) Department of Surgery, the Netherlands Cancer Institute, Plesmanlaan 121, 1066 CX Amsterdam, the Netherlands
- g) Department of Radiology, the Netherlands Cancer Institute, Plesmanlaan 121, 1066 CX Amsterdam, the Netherlands
- h) Department of Medical Oncology, the Netherlands Cancer Institute, Plesmanlaan 121, 1066 CX Amsterdam, the Netherlands

<sup>1</sup>Shared first authors

<sup>2</sup>Shared senior authors

**Supplementary Table 1** Characteristics of patients with gene expression profiles versus patients

without gene expression profiles separated by subtype

GE denoted gene expression, IDC invasive ductal carcinoma, ILC invasive lobular carcinoma, ER

estrogen receptor, HER2 ERBB2, T-stage tumor stadium, N-stage N stadium, SUV standardized uptake

value

| Luminal                          |             | n=364                           |                              |                  |
|----------------------------------|-------------|---------------------------------|------------------------------|------------------|
|                                  |             | no GE data available<br>(n=182) | GE data available<br>(n=182) | p-value          |
| Age                              | <50 yr      | 95 (53%)                        | 104 (57%)                    | 0.44             |
|                                  | >=50 yr     | 84 (47%)                        | 78 (43%)                     |                  |
|                                  | Unknown     | 3                               | 0                            |                  |
| Histology                        | IDC         | 135 (80%)                       | 139 (82%)                    | 0.74             |
|                                  | ILC         | 33 (20%)                        | 31 (18%)                     |                  |
|                                  | Unknown     | 14                              | 12                           |                  |
| Grade                            | Grade 1 & 2 | 122 (88%)                       | 95 (65%)                     | <b>&lt;0.001</b> |
|                                  | Grade 3     | 16 (12%)                        | 52 (35 %)                    |                  |
|                                  | Unknown     | 44                              | 35                           |                  |
| T-stage                          | T1/T2       | 120 (67%)                       | 120 (66%)                    | 0.88             |
|                                  | T3/T4       | 60 (33%)                        | 62(34%)                      |                  |
|                                  | Unknown     | 2                               | 0                            |                  |
| N-stage                          | neg         | 44 (24%)                        | 37 (20%)                     | 0.35             |
|                                  | pos         | 136 (76%)                       | 145 (80%)                    |                  |
|                                  | Unknown     | 2                               | 0                            |                  |
| Response (breast)                | NR or PR    | 143 (79%)                       | 147 (81%)                    | 0.75             |
|                                  | (n)pCR      | 37 (21 %)                       | 35 (19%)                     |                  |
|                                  | Unknown     | 2                               | 0                            |                  |
| Response (breast and lymph node) | No pCR      | 168 (93 %)                      | 174 (96%)                    | 0.34             |
|                                  | pCR         | 12 (7%)                         | 8 (4%)                       |                  |
|                                  | Unknown     | 2                               | 0                            |                  |
| Ki-67                            | >15%        | 94 (67%)                        | 93 (68%)                     | 0.76             |
|                                  | ≤15%        | 47 (33%)                        | 43 (32%)                     |                  |
|                                  | Unknown     | 41                              | 46                           |                  |
| Mass (MRI)                       | Non-mass    | 29 (60%)                        | 27 (68%)                     | 0.49             |
|                                  | Mass        | 19 (40%)                        | 13 (33%)                     |                  |
|                                  | Unknown     | 134                             | 142                          |                  |
| Maximal SUV uptake mean (sd)     |             | 6.12 (2.99)                     | 7.85 (4.17)                  | <b>0.03</b>      |
| Unknown                          |             | 133                             | 142                          |                  |

**HER2**

|                                  |             | n=169                          |                             |         |
|----------------------------------|-------------|--------------------------------|-----------------------------|---------|
|                                  |             | no GE data available<br>(n=73) | GE data available<br>(n=96) | p-value |
| Age                              | <50 yr      | 37 (51%)                       | 54 (57%)                    | 0.43    |
|                                  | >=50 yr     | 36 (49%)                       | 41 (43%)                    |         |
|                                  | Unknown     | 0                              | 1                           |         |
| Histology                        | IDC         | 45 (94%)                       | 68 (97%)                    | 0.37    |
|                                  | ILC         | 3 (6%)                         | 2 (3%)                      |         |
|                                  | Unknown     | 25                             | 26                          |         |
| Grade                            | Grade 1 & 2 | 34 (60%)                       | 40 (44%)                    | 0.07    |
|                                  | Grade 3     | 23 (40%)                       | 50 (56%)                    |         |
|                                  | Unknown     | 16                             | 6                           |         |
| T-stage                          | T1/T2       | 45 (62%)                       | 65 (69%)                    | 0.31    |
|                                  | T3/T4       | 28 (38%)                       | 29 (31%)                    |         |
|                                  | Unknown     | 0                              | 2                           |         |
| N-stage                          | neg         | 18 (25%)                       | 17 (18%)                    | 0.30    |
|                                  | pos         | 55 (75%)                       | 77 (82%)                    |         |
|                                  | Unknown     | 0                              | 2                           |         |
| Response (breast)                | NR or PR    | 22 (31%)                       | 28 (30%)                    | 0.92    |
|                                  | (n)pCR      | 50 (69%)                       | 66 (70%)                    |         |
|                                  | Unknown     | 1                              | 2                           |         |
| Response (breast and lymph node) | No pCR      | 41 (56%)                       | 53 (56%)                    | 0.96    |
|                                  | pCR         | 32 (44%)                       | 42 (44%)                    |         |
|                                  | Unknown     | 0                              | 1                           |         |
| Ki-67                            | >15%        | 7 (25%)                        | 5 (21%)                     | 0.72    |
|                                  | ≤15%        | 21 (75%)                       | 19 (79%)                    |         |
|                                  | Unknown     | 45                             | 72                          |         |
| Mass (MRI)                       | Non-mass    | 13 (68%)                       | 14 (74%)                    | 0.72    |
|                                  | Mass        | 6 (32%)                        | 5 (26%)                     |         |
|                                  | Unknown     | 54                             | 77                          |         |
| Maximal SUV uptake mean (sd)     |             | 5.75 (2.80)                    | 7.1 (2.52)                  | 0.12    |
|                                  | Unknown     | 53                             | 76                          |         |

| Triple negative                  |             | n=204                          |                              |             |
|----------------------------------|-------------|--------------------------------|------------------------------|-------------|
|                                  |             | no GE data available<br>(n=91) | GE data<br>available (n=113) | p-value     |
| Age                              | <50 yr      | 56 (63%)                       | 79 (70%)                     | 0.30        |
|                                  | >=50 yr     | 33 (37%)                       | 34 (30%)                     |             |
|                                  | Unknown     | 2                              | 0                            |             |
| Histology                        | IDC         | 64 (97%)                       | 84 (99%)                     | 0.42        |
|                                  | ILC         | 2 (3%)                         | 1 (1%)                       |             |
|                                  | Unknown     | 25                             | 28                           |             |
| Grade                            | Grade 1 & 2 | 28 (41%)                       | 23 (25%)                     | <b>0.04</b> |
|                                  | Grade 3     | 41 (59%)                       | 68 (75%)                     |             |
|                                  | Unknown     | 22                             | 22                           |             |
| T-stage                          | T1/T2       | 67 (76%)                       | 85 (76%)                     | 0.97        |
|                                  | T3/T4       | 21 (24%)                       | 27 (24%)                     |             |
|                                  | Unknown     | 3                              | 1                            |             |
| N-stage                          | neg         | 41 (46%)                       | 40 (36%)                     | 0.14        |
|                                  | pos         | 48 (54%)                       | 72 (64%)                     |             |
|                                  | Unknown     | 2                              | 1                            |             |
| Response (breast)                | NR or PR    | 37 (42%)                       | 47 (42%)                     | 0.95        |
|                                  | (n)pCR      | 51 (58%)                       | 66 (58%)                     |             |
|                                  | Unknown     | 3                              | 0                            |             |
| Response (breast and lymph node) | No pCR      | 61 (69%)                       | 66 (58%)                     | 0.14        |
|                                  | pCR         | 28 (32%)                       | 47 (42%)                     |             |
|                                  | Unknown     | 2                              | 0                            |             |
| Ki-67                            | >15%        | 2 (5%)                         | 0 (0%)                       | 0.15        |
|                                  | ≤15%        | 39 (95%)                       | 41 (100%)                    |             |
|                                  | Unknown     | 50                             | 72                           |             |
| Mass (MRI)                       | Non-mass    | 4 (22%)                        | 12 (32%)                     | 0.43        |
|                                  | Mass        | 14 (78%)                       | 25 (68%)                     |             |
|                                  | Unknown     | 73                             | 76                           |             |
| Maximal SUV uptake mean (sd)     | Unknown     | 11.71 (6.63)                   | 13.97 (8.65)                 | 0.33        |
|                                  |             | 73                             | 76                           |             |

**Supplementary Table 2** Multivariate cox proportional hazard analysis of the risk of recurrence

(recurrence free survival) for clinical markers and a succesful gene expression profile.

GE denoted gene expression, IDC invasive ductal carcinoma, ILC invasive lobular carcinoma, ER estrogen receptor, HER2 ERBB2, T-stage tumor stadium, N-stage N stadium

| Variable | event/total n        | HR (95% CI) | p-value          |                  |
|----------|----------------------|-------------|------------------|------------------|
| Age2     | <50 year             | 72/426      | 1.00             | 0.15             |
|          | >= 50 year           | 62/306      | 1.33 (0.90-1.96) |                  |
| ER       | Neg                  | 58/269      | 1.00             | <b>0.03</b>      |
|          | Pos                  | 77/463      | 0.62 (0.40-0.94) |                  |
| HER2     | Neg                  | 112/561     | 1.00             | <b>0.001</b>     |
|          | Pos                  | 23/169      | 0.41 (0.24-0.69) |                  |
| Grade2   | Grade 1 or 2         | 55/341      | 1.00             | 0.23             |
|          | Grade 3              | 56/250      | 1.30 (0.85-1.96) |                  |
| T_stage2 | T1/T2                | 85/502      | 1.00             | 0.22             |
|          | T3/T4                | 48/227      | 1.28 (0.86-1.90) |                  |
| N_stage  | Neg                  | 19/198      | 1.00             | <b>&lt;0.001</b> |
|          | Pos                  | 115/533     | 3.10 (1.76-5.48) |                  |
| GEdata   | No GE data available | 55/343      | 1.00             | 0.33             |
|          | GE data available    | 80/391      | 1.23 (0.82-1.85) |                  |

**Supplementary Fig. 1** Flow diagram of included patients in validation dataset (RASTER study).

DCIS denoted ductal carcinoma in situ

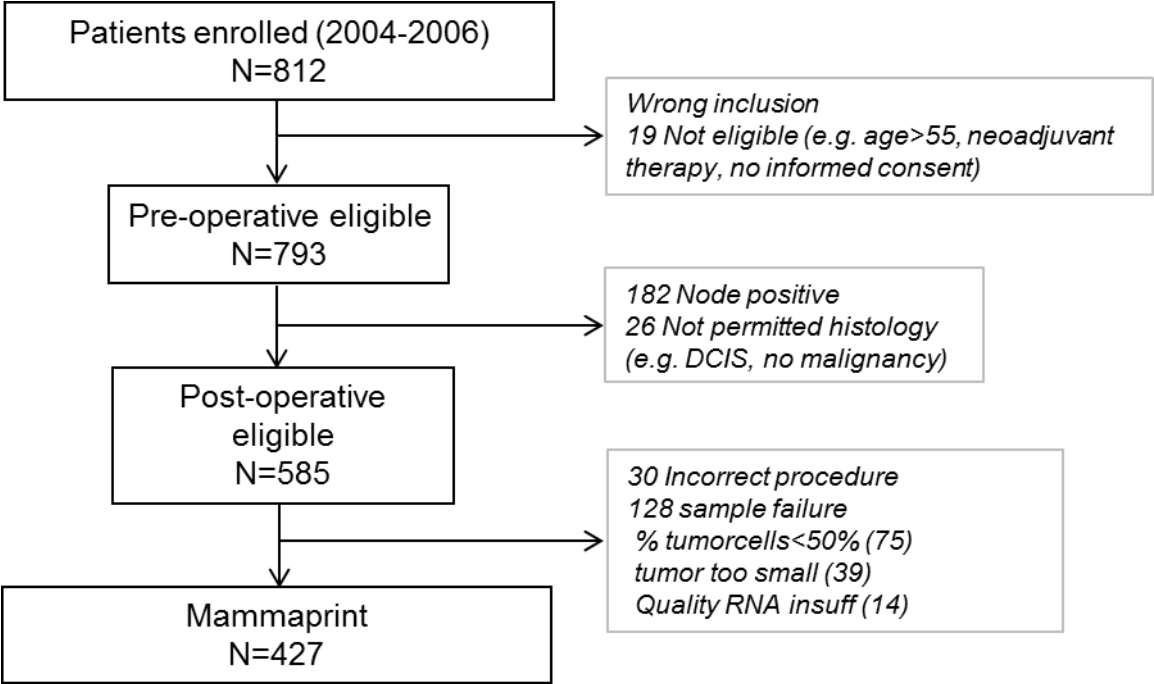

Supplement: MOESM1 [file 15315378]
